1

2 To be submitted to: *Scientific Reports*

3 **Running title:** Plastid phylogenomics of the orchid family

4

5 **Plastid phylogenomics resolves ambiguous relationships within the orchid**  
6 **family and provides a solid timeframe for biogeography and macroevolution**

7

8 Maria Alejandra Serna-Sánchez<sup>1,2+</sup>, Oscar A. Pérez-Escobar<sup>3\*+</sup>, Diego Bogarín<sup>4,5+</sup>, María Fernanda  
9 Torres<sup>6</sup>, Astrid Catalina Alvarez-Yela<sup>7</sup>, Juliana E. Arcila<sup>1</sup>, Climbie F. Hall<sup>8</sup>, Fábio de Barros<sup>8</sup>,  
10 Fábio Pinheiro<sup>9</sup>, Steven Dodsworth<sup>10</sup>, Mark W. Chase<sup>3</sup>, Alexandre Antonelli<sup>3,6,11</sup>, Tatiana  
11 Arias<sup>1,7,12\*</sup>

12

13 <sup>1</sup> Laboratorio de Biología Comparativa. Corporación para Investigaciones Biológicas (CIB), Cra. 72 A No.  
14 78 B 141, Medellín, Colombia.

15 <sup>2</sup> Biodiversity, Evolution and Conservation. EAFIT University, Cra. 49, No. 7 sur 50, Medellín,  
16 Colombia.

17 <sup>3</sup> Royal Botanic Gardens, Kew, TW9 3AE, London, UK.

18 <sup>4</sup> Jardín Botánico Lankester, Universidad de Costa Rica, P. O. Box 302-7050, Cartago, Costa Rica.

19 <sup>5</sup> Naturalis Biodiversity Center, Endless Forms group, P.O. Box 9517, 2300 RA Leiden, The  
20 Netherlands; Herbario UCH, Universidad Autónoma de Chiriquí, David, Panamá.

21 <sup>6</sup> Gothenburg Global Biodiversity Centre, Department of Biological and Environmental Sciences,  
22 University of Gothenburg, 405 30 Gothenburg, Sweden.

23 <sup>7</sup> Centro de Bioinformática y Biología Computacional (BIOS). Ecoparque Los Yarumos Edificio BIOS,  
24 Manizales, Colombia.

25 <sup>8</sup> Instituto de Botânica, Núcleo de Pesquisa Orquídario do Estado, 68041, São Paulo.

26 <sup>9</sup> Universidade Estadual de Campinas, Instituto de Biologia, Departamento de Biologia Vegetal, 13083-862,  
27 Campinas-SP, Brazil

28 <sup>10</sup> School of Life Sciences, University of Bedfordshire, University Square, Luton, LU1 3JU, UK.

29 <sup>11</sup> Department of Plant Sciences, University of Oxford, South Parks Road, OX1 3RB Oxford, United  
30 Kingdom

31 <sup>12</sup> Tecnológico de Antioquia, Calle 78B NO. 72A - 220 Medellín- Colombia

32 \* Corresponding Authors: T.A. ([tatiana.arias48@tdea.edu.co](mailto:tatiana.arias48@tdea.edu.co)) & O.A.P.E. ([o.perez-escobar@kew.org](mailto:o.perez-escobar@kew.org))

33 <sup>+</sup>These authors contributed equally to the study

34

35 All data have been deposited in Bioproject (XXXXXXX) and SRA (XXXXXXX).

36

### 37 **ABSTRACT [291 words]**

38 Recent phylogenomic analyses based on the maternally inherited plastid organelle have  
39 enlightened evolutionary relationships between the subfamilies of Orchidaceae and most of the  
40 tribes. However, uncertainty remains within several subtribes and genera for which phylogenetic  
41 relationships have not ever been tested in a phylogenomic context. To address these knowledge-  
42 gaps, we here provide the most extensively sampled analysis of the orchid family to date, based on  
43 78 plastid coding genes representing 264 species, 117 genera, 18 tribes and 28 subtribes.  
44 Divergence times are also provided as inferred from strict and relaxed molecular clocks and birth-  
45 death tree models. Our taxon sampling includes 51 newly sequenced plastid genomes produced by  
46 a genome skimming approach. We focus our sampling efforts on previously unplaced clades within  
47 tribes Cymbidieae and Epidendreae. Our results confirmed phylogenetic relationships in  
48 Orchidaceae as recovered in previous studies, most of which were recovered with maximum  
49 support (209 of the 262 tree nodes). We provide for the first time a clear phylogenetic placement  
50 for Codonorchideae within subfamily Orchidoideae, and Podochilieae and Collabieae within  
51 subfamily Epidendroideae. We also identify relationships that have been persistently problematic  
52 across multiple studies, regardless of the different details of sampling and genomic datasets used  
53 for phylogenetic reconstructions. Our study provides an expanded, robust temporal phylogenomic  
54 framework of the Orchidaceae that paves the way for biogeographical and macroevolutionary  
55 studies.

56

57 **Key words:** Cymbidieae, High-throughput sequencing, Orchidaceae, Orchidoideae,  
58 Phylogenomics, Whole Plastid Genome

59

60

## 61 **1. Introduction**

62

63 Orchidaceae, with *ca.* 25,000 species and ~800 genera<sup>1,2</sup> are one of two of the most diverse  
64 and widely distributed flowering plant families on Earth and have captivated the attention of  
65 scientists for centuries<sup>3</sup>. The family has a striking morphological and ecological diversity and

66 evolved complicated interactions with fungi, animal and other plants<sup>4,5</sup> and a diverse array of  
67 sexual systems<sup>6-8</sup>. Numerous efforts have been made to understand the natural history, evolution  
68 and phylogenetic relationships within the family<sup>2,7,9-13</sup>. To date, there are seven nuclear genome  
69 sequences available, i.e., *Apostasia shenzhenica*<sup>14</sup>, *Dendrobium catenatum*<sup>15</sup>, *D. officinale*<sup>16</sup>,  
70 *Gastrodia elata*<sup>17</sup>, *Phalaenopsis equestris*<sup>18</sup>, a *Phalaenopsis* hybrid cultivar<sup>19</sup>, *P. aphrodite*<sup>20</sup>,  
71 *Vanilla planifolia*<sup>21</sup>, 221 complete plastid genomes and 2,678 sequence read archives for  
72 Orchidaceae in NCBI (accessed 22 August 2020).

73 Phylogenomic approaches have been implemented to infer relationships between major  
74 orchids clades in deep and recent time<sup>2,10,12,13,22,23</sup>, but extensive uncertainties remain regarding the  
75 phylogenetic placement of several subtribes. This knowledge-gap stems from the large gaps in both  
76 taxonomic and genomic sampling efforts that would be required to comprehensively cover all  
77 major orchid clades (subtribes/groups of genera). Givnish et al.<sup>2</sup> published the first well-supported  
78 analysis of Orchidaceae based on plastid phylogenomics. They performed a maximum likelihood  
79 (ML) analysis of 75 genes from the plastid genome of 39 orchid species, covering 22 subtribes, 18  
80 tribes and five subfamilies. This robust but taxonomically under-sampled study agreed  
81 corroborated relationships of the subfamilies and tribes, observed in previous studies<sup>10-13</sup>.

82 Previous orchid studies have failed to resolve relationships in rapidly diversifying clades<sup>24-</sup>  
83 <sup>26</sup> because of reduced taxon and data sampling<sup>27</sup>. This is particularly true for Cymbidieae and  
84 Pleurothallidinae, the two most species-rich groups in which generic relationships are largely the  
85 product of rapid diversification<sup>28</sup> that is difficult to resolve using only a few loci<sup>25,29</sup>. Cymbidieae  
86 comprise 10 subtribes, ~145 genera and nearly 3,800 species<sup>1</sup>, 90% of which occur in the  
87 Neotropics<sup>28</sup>. Four of these subtribes are among the most species-rich in the Andean and Chocoran  
88 region (Maxillariinae, Oncidiinae, Stanhopeinae and Zygopetaliinae<sup>30,31</sup>). Pleurothallidinae include  
89 ~ 5,500 exclusively Neotropical species in 47 genera. Pleurothallid orchids are one of the most  
90 prominent components of the cloud forest flora in the northern and central Andes and Central  
91 America<sup>32</sup>.

92 Another group in which phylogenetic relationships are unresolved is Orchidoideae<sup>1,33</sup>. This  
93 group comprises four mostly terrestrial tribes, 25 subtribes and over 3,600 species. The subfamily  
94 occurs on all continents except the Antarctic. Previous efforts to disentangle the phylogenetic  
95 relationships in the subfamily have mostly relied on a small set of nuclear and plastid markers<sup>34</sup>,  
96 and more recently on extensive plastid coding sequence data<sup>2</sup>.

97 The wide geographical range of these groups in the tropics and temperate regions and their

98 striking vegetative and reproductive morphological variability make them ideal model clades for  
99 disentangling the contribution of abiotic and biotic drivers of orchid diversification across biomes.  
100 Occurring from alpine ecosystems to grasslands, they have conquered virtually all ecosystems  
101 available in any elevational gradient<sup>35–37</sup>, showing independent transitions to terrestrial, rupicolous  
102 and epiphytic habit. Moreover, they have evolved a diverse array of pollination systems<sup>38–40</sup>,  
103 rewarding species offering scent, oil and nectar, and even food- and sexual deceptive species<sup>41,42</sup>.  
104 However, the absence of a solid phylogenetic framework has precluded the study of how such  
105 systems evolved and the diversification dynamics of Cymbidieae, Pleurothallidinae and  
106 Orchidoideae more broadly.

107         Phylogenetic analyses are crucial to understanding the drivers of diversification in orchids,  
108 including the mode and tempo of morphological evolution<sup>30,43</sup>. High-throughput sequencing and  
109 modern comparative methods have enabled the production of massive molecular datasets to  
110 reconstruct evolutionary histories and thus provide unrivalled knowledge on plant phylogenetics<sup>44</sup>.  
111 Here, we present the most densely sampled plastid analysis of Orchidaceae, including data from 51  
112 newly sequenced plastid genomes,. We apply two general approaches: a) maximum likelihood  
113 phylogenetic analysis conducted on 78 plastid coding regions to inform relationships; b) Bayesian  
114 inference in combination with strict and relaxed molecular clocks and a birth-death model applied  
115 to a subset of the plastid coding regions to produce a temporal framework of the orchid family. Our  
116 study expands the current generic representation for the Orchidaceae and clarifies previously  
117 unresolved phylogenetic relations within the Cymbidieae, Pleurothallidinae and Orchidoideae. The  
118 results reported here provide a robust framework for the orchid family and new insights into  
119 relationships at both deep and shallow phylogenetic levels.

## 120 **2. Results**

### 121 *2.1 Phylogenetic relationships and divergence times in the orchid family*

122 The ML tree derived from the 78 plastid genes is provided in Fig. 1. Two hundred-and-  
123 thirty-one nodes were recovered as strongly supported (i.e. likelihood bootstrap percentage [LBP]  
124 = 85-100), of which 209 attained maximum support. Only 26 nodes recovered LBPs between 25  
125 and 84 (Fig. 1, inset). Unsupported relationships were restricted to Epidendroideae and  
126 Orchidoideae but were more frequent in Epidendroideae and often linked to low levels of sequence  
127 variation. Here, poorly supported relationships occurred mostly towards the backbone of the tribes  
128 Arethuseae, Cymbidieae, Epidendreae and Neottieae and Tropidieae + Nervilieae and the most  
129 recent common ancestor (MRCA) of Arethuseae, Malaxideae, Podochilieae, Collabieae,  
130 Epidendreae, Vandaeae and Cymbidieae. Intrageneric relationships were robustly supported, with  
131 only two instances for which few nodes were recovered as poorly supported (*Dendrobium*: 3;  
132 *Cymbidium*: 1; Fig. S1).

133 Absolute times of divergence under strict and relaxed clocks for Orchidaceae, subfamilies  
134 and most tribes are provided in Table 1 (phylogenetic trees with mean ages and intervals of  
135 confidence produced under both clock models are provided on Figs S2, S3). Strict and relaxed  
136 molecular clocks revealed similar ages of divergence for the majority of the MRCAs of main  
137 orchid clades, although we found stark differences in the length of the 95% highest posterior  
138 density intervals (HPD) derived from both models are obvious, with the relaxed clock producing  
139 larger HPDs (Tab. 1; Fig. S2, S3; Tab. S1, S2). Under the strict and relaxed clocks, Orchidaceae  
140 diversified first during the late Cretaceous ( $88.1 \text{ my} \pm 3$ ;  $89.1 \text{ my} \pm 9$ , respectively). The largest  
141 differences on the MRCA ages occurred in Epidendroideae ( $44 \text{ my} \pm 2$  vs  $60 \text{ my} \pm 10$  under a strict  
142 and relaxed clock models, respectively) and Vanilloideae ( $80 \text{ my} \pm 4$  vs  $67 \text{ my} \pm 9$ ). A complete  
143 account of mean and median ages, HPDs, branch lengths and rate values estimated for all nodes of  
144 chronograms estimated strict and relaxed molecular clock models are provided on Tab. S1, S2.

145

### 146 *2.2. Phylogenetic informativeness of plastid genes*

147 Phylogenetic informativeness plots are provided on Fig. S4 (see Tab. S3,S4 for a detailed  
148 account of PI per-site and net values for each assessed locus). Per-site and net phylogenetic  
149 informativeness (PI) analyses recovered both *ycf1* as the most informative locus, which attained the  
150 highest values at a reference time (phylogenetic depth) of 0.51. On average, plastid loci attained  
151 their highest PI value at a reference time of 0.85 (SD=0.16). In contrast, the highest PI values of

152 the 10 most informative loci occurred at an average reference time of 0.63 (SD=0.11) and 0.80  
153 (SD=0.17) for per-site and net PI calculations.

154

### 155 **3. Discussion**

#### 156 *3.1 A robust temporal phylogenomic framework for the orchid family*

157 Previous phylogenomic studies of the orchid family included up to 74 species representing  
158 18 tribes, 19 subtribes and 66 genera<sup>27</sup>. Our study sampled 264 species from all subfamilies,  
159 representing 18 tribes (out of 22), 28 subtribes (out of 46) and 74 genera (~10% of the currently  
160 recognised genera; Fig. 2). In general, our phylogenomic frameworks are in agreement with  
161 previously published family-wide orchid analyses either inferred from dozens of markers<sup>2,13</sup> or  
162 from a handful of loci<sup>29</sup>. Here, representativeness of Cymbidieae and Epidendreae, two of the most  
163 prominent tropical Epidendroideae<sup>45</sup> clades, have increased from eight to 32 genera and six to 30,  
164 respectively<sup>2,27</sup>. In particular, relationships inferred from extensive plastid data within  
165 Zygopetaliinae (Cymbidieae) and Pleurothallidinae (Epidendreae) are presented for the first time.  
166 Our 78-coding sequence plastid ML analysis led to similar results as reported by Givnish et al.<sup>2</sup>,  
167 Niu et al.<sup>13</sup> and Li et al.<sup>27</sup> but with an overall clear increase in support: 22% of nodes with LBS <  
168 85 in Givnish et al.<sup>2</sup> and 21% in Li et al.<sup>27</sup> vs 11.5% in this study. This is particularly evident in  
169 relationships inferred within Orchidoideae (see section 3.5 of *Discussion*) and Cymbidieae,  
170 Epidendreae (see sections 3.3 and 3.4 of *Discussion*, respectively) and Collabieae. For the last, for  
171 the first time we provide high support for the previously unresolved relationship of  
172 Podochilieae+Collabieae<sup>2,27</sup>.

173 The absolute age estimates derived from our strict and relaxed molecular clocks and five of  
174 the most informative plastid loci are in line with previous nuclear-plastid multi-locus and  
175 phylogenomic plastid-only chronograms<sup>2,46,47</sup>. Nonetheless, our ML tree also identifies intricate  
176 relationships that have been consistently recovered as unsupported in several studies. These include  
177 unsupported basal nodes in Epidendroideae representing Sobralieae, Nervilieae and Tiphoreae<sup>27,48</sup>,  
178 *Arundina*+remainder of Arethuseae<sup>27</sup>, and the position of Eulophiinae in the Cymbidieae<sup>25,28,49</sup>  
179 (Fig. 2). Uncertainty around the phylogenetic position of these clades might be due to limited taxon  
180 sampling in this and previous studies. Alternatively, intragenomic conflict<sup>50–52</sup> and lack of  
181 phylogenetic informativeness required to sort out relationships derived from rapid  
182 diversifications<sup>22,53,54</sup> in plastid DNA sequences (regardless of whether whole plastid genome  
183 datasets are employed<sup>55</sup>) might hamper the phylogenetic placement of clades with robust support.

184

### 185 3.3 Improved support of phylogenetic relationships within Cymbidieae

186 Multiple studies have inferred evolutionary relationships in Cymbidieae from  
187 morphological and molecular characters<sup>28,29</sup>. Relationships among subtribes have recently been  
188 estimated using the plastid genes *psaB*, *rbcL*, *matK* and *ycf1* combined with the low-copy nuclear  
189 gene *Xdh*<sup>25</sup>. Here, Cymbidiinae was sister to the remainder of Cymbidieae. Poorly supported and  
190 incongruent relationships were found among Catasetinae, Eulophiinae and Eriopsidinae, however,  
191 when compared with the topologies obtained by Whitten et al.<sup>29</sup>, Freudenstein & Chase<sup>48</sup> and  
192 Pérez-Escobar et al.<sup>7</sup>

193 The most complete taxonomic sampling conducted to date under a plastid phylogenomic  
194 framework<sup>2</sup> included 8 of 11 subtribes of Cymbidieae, but some inter-subtribal relationships were  
195 unresolved: Stanhopeinae (20 genera), Maxillariinae (12 genera), Zygopetalinae (36 genera),  
196 Oncidiinae (65 genera) and Eulophiinae (13 genera). A clade formed by Stanhopeinae and  
197 Maxillariinae had poor support (LBP=62) and their relationship to Zygopetaliinae also had low  
198 support (LBP=72). The relationship between Eulophiinae and a clade of Stanhopeinae,  
199 Maxillariinae, Zygopetalinae and Oncidiinae also had poor support (LBP=42). One of the  
200 outcomes of our expanded sampling (nine subtribes) is the improvement of support in Cymbidieae,  
201 more specifically for nodes of some groups involved in rapid diversifications that historically have  
202 been problematic to resolve<sup>2,29</sup>. In particular, Maxillariinae+Stanhopeinae and  
203 Catasetinae+Cyrtopodiinae are now both strongly supported (LBP=100). In addition, our results  
204 also support the placement of *Dipodium* (Dipodiinae) is supported as sister to the rest of  
205 Cymbidieae, a relationship which was previously recovered from a few loci<sup>25</sup>. However, our  
206 plastid phylogenomic framework is still incomplete due to absence of representatives of  
207 Eriopsidiinae and Coleopsidinae.

208 One other novelty of our study is the inference of relationships in Zygopetalinae, a subtribe  
209 in which relationships have previously been poorly understood<sup>56</sup>. The most extensively sampled  
210 analysis of Zygopetalinae inferred from plastid markers (*matK-ycf1*)<sup>29</sup> included 60 species and 27  
211 genera, but relationships between most genera attained only low support. Our expanded molecular,  
212 but taxonomically reduced, matrix (i.e. 20 genera and 21 species) produced greater support for the  
213 backbone relationships in the subtribe, including the radiation of the *Huntleya* clade (*Dichaea*,  
214 *Huntleya*, *Chaubardia* and the *Chondrorhyncha* complex<sup>56,57</sup>). Nonetheless, relationships between  
215 the *Huntleya* grade (i.e. *Huntleya* clade + *Cryptarrhena*) and the remainder of Zygopetalinae still



216 remains unresolved.

217 Our phylogenetic analyses further place for the first time in the orchid tree of life  
218 *Cheiradenia* and *Hoehneella* with moderate to strong support (Fig. 1, S1). *Cheiradenia* is a  
219 monospecific genus restricted to the lowland wet forests of Venezuela and Guyana whereas  
220 *Hoehneella* includes two species exclusively distributed in the Brazilian evergreen wet forests of  
221 the Brazilian states of Espírito Santo and São Paulo<sup>58</sup>. Referring to the similarity of both vegetative  
222 and floral reproductive characters, Pupulin<sup>58</sup> hypothesised that *Cheiradenia* should be closely  
223 related to members of the *Zygopetalum* clade (e.g. *Koellensteina*, *Paradisanthus*), with *Hoehneella*  
224 being related to the *Huntleya* clade (i.e. *Huntleya* and *Chaubardia*). Our ML tree supports both  
225 assumptions, placing *Cheiradenia* as sister to *Paradisanthus* with maximum support and  
226 *Hoehneella* as sister to *Chaubardia* in a moderately supported clade (83 LBP: Fig. 1, S1).  
227 *Koellensteina kellneriana* (the taxonomic type of the genus) clustered with *Acacallis* and not with  
228 *Otostylis* and *Paradisanthus*, and therefore we confirm that *Koellensteina* in the strict sense is  
229 related to *Acacallis*. In addition, *Otostylis* is recovered as sister to *Warrea* and not to  
230 *Paradisanthus* as previously suggested by Williams et al.<sup>56</sup> based on a weakly supported  
231 placement. Our results also highlight the extensive and independent terrestrial and epiphytic habit  
232 transitions occurring in this clade, as most sister genera shows different habit types.

233

### 234 3.5. Novel and robust relationships in the most rapidly diversifying subtribe Pleurothallidinae

235 One of the most spectacular Neotropical plant diversifications is perhaps that of the  
236 Pleurothallidinae, for it involves the evolution of ~5,000 species that have conquered virtually all  
237 biogeographical regions in the American tropics<sup>32,45</sup>. The rapid radiation of Pleurothallidinae  
238 occurring in the last ~20 Myrs<sup>28</sup> is associated with the evolution of a diverse suite of pollination  
239 systems ranging from food deception<sup>59</sup> to pseudocopulation<sup>60</sup> linked to dipterans<sup>61,62</sup> and a complex  
240 array of reproductive and vegetative morphologies<sup>22,32</sup>. Understanding of relationships in the  
241 subtribe has relied mostly on relatively small number of markers<sup>63–65</sup>, which have informed with  
242 some confidence the phylogenetic placement and monophyly of genera in Pleurothallidinae, yet  
243 basal nodes in these trees have often lacked good support.

244 Several attempts have been conducted to estimate generic relationships in the subtribe,  
245 most of which have relied on nuclear rITS and plastid *matK* markers<sup>66</sup>. A synthesis of the  
246 phylogenetic relationships in the subtribe based on such studies was conducted by Karremans<sup>67</sup>.  
247 Here, a cladogram depicting the commonest topologies of relationships between genera was



248 provided and nine clades were defined (termed “affinities” by the author) but without considering  
249 the magnitude of the support for these (see Figure 2 in Karremans<sup>67</sup>). Our plastid phylogenomic  
250 analysis recovered well-supported relationships in Pleurothallidinae that are mostly in line with  
251 previously published studies<sup>28,63,68</sup>. However, these previous trees based on a handful of DNA  
252 nuclear and plastid markers yielded poor resolution and low support for backbone nodes as well as  
253 infrageneric relationships. In contrast, our plastid phylogenomic inferences recovered high support  
254 along the backbone, thus recovering novel placements. Some of these noteworthy well-supported  
255 relationships are the position of *Acianthera* as sister to *Myoxanthus* and *Dresslerella* as sister to  
256 *Barbosella*+*Restrepia* (Fig. 1, S1).

257 *Acianthera* includes over 300 species distributed throughout the American tropics and  
258 subtropics<sup>64,69,70</sup>, is often retrieved as sister to the remainder of Pleurothallidinae with moderate  
259 support<sup>68</sup>. Karremans<sup>67</sup> used a series of “affinities” to describe to groups of genera affiliated with a  
260 core genus of these group and thus described the “*Acianthera* affinity” as the frequent clustering of  
261 several Central American genera with *Acianthera*<sup>64</sup>. Our study contradicts Karreman’s<sup>67</sup> concept of  
262 the *Acianthera* affinity by placing with high support *Acianthera* in the *Restrepia* affinity as sister to  
263 *Myoxanthus*. *Dresslerella* was previously recovered with low support as sister to the remaining  
264 genera in the *Restrepia* affinity (*Barbosella*, *Echinosepala*, *Myoxanthus*, *Restrepia*, *Restrepiella*  
265 and *Restrepiopsis*). In contrast, our analysis robustly places *Dreslerella* as sister to *Restrepia* and  
266 *Barbosella*, a result that does not support the monophyly of the *Restrepia* affinity.

267 Although estimates of the ancestral distribution of the Pleurothallidinae are still uncertain,  
268 most of the early divergent Pleurothallidinae and their sister groups are found in the Antilles or  
269 Brazil<sup>28</sup>. The remarkable relationship recovered here for *Acianthera*+*Myoxanthus* could yield more  
270 clues about the biogeographic history and evolution of the subtribe because Brazil harbours a high  
271 species diversity of *Acianthera* and some of the early divergent clades in *Myoxanthus* (particularly  
272 the species close to *M. lonchophyllus*), whereas *Myoxanthus* is notably absent in the Antilles. In  
273 addition, other early divergent clades such as *Octomeria* and *Barbosella* are more diverse in Brazil.  
274 These early diverging clades share the lack of stem annulus as a morphological symplesiomorphy,  
275 a character that later appears in more diverse clades such as *Masdevallia*+*Dracula*, *Lepanthes*, and  
276 *Pleurothallis*+*Stelis*<sup>71</sup>. Members of these clades probably diversified after a migration to the  
277 mountainous areas of the northern Andes ca 16 ± 5 Ma and together account for almost 80% of the  
278 species in the subtribe<sup>28</sup>. The modern range extends mostly along the Andean and Central  
279 American mountain ranges. Here, another noteworthy relationship is that the less diverse

280 *Specklinia* clade (*Scaphosepalum*+*Platystele*) was recovered as sister to the most species-rich  
281 clades of the subtribe (*Masdevallia*, *Lepanthes*, and *Pleurothallis*). In previous phylogenetic  
282 analyses *Specklinia* clade was recovered as sister to just *Pleurothallis*<sup>28</sup>.

283 Likewise, relationships between early divergent members in the *Lepanthes* affinity  
284 (*Anathallis*, *Draconanthes*, *Epibator*, *Lepanthes*, *Opilionanthe*, *Trichosalpinx* and *Tubella*) were  
285 largely weakly supported, demonstrating the need for increased taxon sampling, principally in  
286 *Lepanthopsis* and *Tubella*<sup>32</sup>. In particular, the early diversification of the *Lepanthes* affinity (>1500  
287 spp.), inferred to have occurred around 8 Ma, has been linked to colonisation of newly formed  
288 environments in the Andean Cordillera, a product of accelerated mountain uplift and specific  
289 pollination systems (pseudocopulation and food mimicry<sup>60</sup>).

290 Another novel placement concerns *Teagueia* (diverse in Colombia, Ecuador and Peru<sup>72–74</sup>),  
291 which resembles *Platystele*<sup>75</sup>. Karremans<sup>76</sup> had suggested a close relationship between *Teagueia*  
292 and *Scaphosepalum*, but our results place *Teagueia* as sister to *Platystele* with high support, thus  
293 corroborating the long-standing hypotheses of their sister relationship based on the of their  
294 reproductive structures<sup>74,75</sup>.

295

### 296 3.5. Evolutionary relationships in Orchidoideae

297 Our study provides a well-supported tree for Orchidoideae. Our ML inference supports the  
298 findings of Pridgeon et al.<sup>35</sup> in which Diurideae is sister to Cranichideae and Codonorchideae to  
299 Orchideae. Our findings differ from Givnish et al.<sup>2</sup> and Salazar et al.<sup>34</sup>, in which  
300 Diurideae/Cranichideae are sister to Codonorchideae, with Orchideae sister to all these (Fig. 2).  
301 Givnish et al.<sup>2</sup> included all four tribes but only six of 21 subtribes of Orchidoideae, and the  
302 relationship of Diurideae to Cranichideae was poorly supported.

303

## 304 Conclusions

305 This study presents a well-resolved, more densely sampled and strongly supported analysis of  
306 Orchidaceae and their absolute times of divergence than all previous such studies. For deep  
307 branches and recent diversifications in Cymbidieae and Epidendreae, support is improved, yet  
308 several recalcitrant nodes that historically have been challenging to resolve were also found (e.g.  
309 early divergent taxa in the Epidendroideae, initial radiation of the *Lepanthes* affinity in  
310 Pleurothallidinae). Similarly, our analyses provide the a well-supported result for Orchidoideae.  
311 Although taxon sampling was sufficient to resolve the relationships between the major clades in

312 the family, sampling of unrepresented genera and representatives of Eriopsidiinae, Goodyerinae,  
313 and Coleopsidinae would further enhance our understanding of phylogenetic relationships.

## 314 **Material and methods**

315

### 316 *2.1 Sampling, DNA extraction and sequencing*

317 Two-hundred and sixty-four species representing 117 genera, 28 subtribes and 18 tribes  
318 were sampled in this study. For 51 species plastid genomes were sequenced. Table S5 provides  
319 accession numbers of plastid genomes sourced from NCBI and GenBank numbers of those newly  
320 generated. Fresh leaves were stored in silica gel for subsequent DNA extraction using a CTAB  
321 method<sup>77</sup>. Total DNA was purified with silica columns and then eluted in Tris-EDTA<sup>78</sup>. DNA  
322 samples were adjusted to 50 ng/uL and sheared to fragments of approximately 500 bp.

323

### 324 *High-throughput sequencing*

325 The library preparation, barcoding and sequencing (Illumina HiSeqX) were conducted at  
326 Rapid Genomics LLC (Gainesville, FL, USA) and Genewiz GmbH (Leipzig, Germany). Pair-end  
327 reads of 150 bp were obtained for fragments with insert size of 300-600 bp. Overhangs were blunt  
328 ended using T4 DNA polymerase, Klenow fragment and T4 polynucleotide kinase. Subsequently,  
329 a base 'A' was added to the 3' end of the phosphorylated blunt DNA fragments. DNA fragments  
330 were ligated to adapters, which have a thymine (T) overhang. Ligation products were gel-purified  
331 by electrophoresis to remove all unbound adapters or split adapters that were ligated together.  
332 Ligation products were then selectively enriched and amplified by PCR. For each sample, between  
333 one and 10 million paired-end reads were generated.

334

### 335 *Plastid genome assembly and annotation*

336 Raw sequences were quality filtered using Trimmomatic<sup>79</sup> in order to eliminate sequencing  
337 artefacts, improve uniformity in the read length (>40 bp) and ensure quality (>20) for further  
338 analysis. Filtered sequences were processed with BBNorm<sup>80</sup> to normalize coverage by down-  
339 sampling reads over high-depth areas of the genomes (maximum depth coverage 900x and  
340 minimum depth 6x). This step creates a flat coverage distribution in order to improve read  
341 assembly. Subsequently, overlapping reads were merged into single reads using BBmerge<sup>81</sup> in  
342 order to accelerate the assembly process. Overlapping of paired reads was evaluated with Flash<sup>82</sup> to  
343 reduce redundancy. Merged reads were used to carry out the whole genome de novo assembly with  
344 SPAdes (hash length 33,55,77)<sup>83</sup>.

345 To produce contiguous, linear plastid genome sequences we relied on a reference-based and

346 *de-novo* approaches. The reference based approach was conducted on MIRA v. 4<sup>84</sup>, a software that  
347 maps read data against a consensus sequence of a reference assembly (simple mapping). MIRA has  
348 been useful for assembling complicated genomes with many repetitive sequences<sup>85–87</sup>. MIRA  
349 produces BAM files as output, which were subsequently used to generate consensus sequences in  
350 SAMTOOLS<sup>88</sup>. We sourced 11 reference plastomes from the NCBI repository that represent  
351 related species, namely: *Cattleya crispata*, *Goodyera fumata*, *Masdevallia picturata*, *M. coccinea*,  
352 *Oncidium sphacelatum* and *Sobralia callosa*. The *de-novo* assembly approach relied on  
353 GetOrganelle<sup>89</sup>, using the recommended default settings for assemblies of green-plant plastid  
354 genomes.

355 Newly sequenced and datamined plastid genomes were annotated through the Chlorobox  
356 portal of the Max Planck Institute<sup>90</sup>. Sequences were uploaded as fasta files, and running  
357 parameters were established as follow: BLAST protein search identity=65%, BLAST rRNA,  
358 tRNA, DNA search identity=85%, genetic code = bacterial/plant plastid, max intron length=3,000,  
359 options= allow overlaps. *Apostasia wallichii*, *Masdevallia picturata*, *Oncidium sphacelatum*,  
360 *Sobralia callosa* and *Goodyera fumata* were set as the ‘Server Reference’ and *Cattleya liliputana*  
361 was set as the ‘Custom Reference’ for CDS and tRNA, rRNA, primer, other DNA or RNA  
362 specifications.

363

### 364 *Phylogenetic analysis*

365 A set of 78 plastid genes was used to reconstruct phylogenetic relationships in Orchidaceae.  
366 These were aligned<sup>91</sup> using MAFFT 7<sup>92</sup> and subsequently concatenated (proportions of missing  
367 data per species is provided on Tab. S5). This step was performed at the supercomputing centre  
368 APOLO, EAFIT University, Medellín, Colombia. Phylogenetic reconstruction based on maximum  
369 likelihood (ML) was implemented in RAxML v. 8.0<sup>93</sup>, using 1,000 bootstrap replicates and the  
370 GTR+GAMMA model. Absolute age estimation analyses relied on fossil and secondary calibration  
371 points, strict and molecular clocks and a birth/death model implemented in BEAST v. 1.8<sup>94</sup>. The  
372 fossil constraint was added to the MRCA of *Dendrobium* following Xiang et al.<sup>95</sup> using a normal  
373 distribution with mean value of 21.07 and a standard deviation (SD) of 3.0. Following Givnish et  
374 al.<sup>2</sup>, the two secondary calibration points were added to the root of the tree and MRCA of the  
375 Orchidaceae, using a normal distribution and mean values of 123.48 (SD=2.0) and 90 (SD=2.0).  
376 Because dating analyses conducted on dozens of gene alignments and hundreds of terminals are  
377 extremely computationally greedy, we estimated absolute ages on the five most phylogenetically

378 informative genes (see below) and by constraining the tree topology to the ML tree derived from  
379 RAxML. For each clock model, we conducted two MCMC analyses with 250 million generations  
380 each with a sampling frequency of 10000 generations. The convergence of the strict and relaxed  
381 molecular clocks parameters was confirmed on the software TRACER v1.6.  
382 (<http://tree.bio.ed.ac.uk/software/tracer/>). Maximum clade credibility trees were summarised from  
383 the MCMC trees in the program TreeAnnotator v.1.8. of the software BEAST.

384

### 385 *Phylogenetic informativeness profiles*

386 To estimate the phylogenetic informativeness (PI) of plastid genes we calculated the per-  
387 site and net values for each assessed locus with the HyPhy substitution rates algorithm for DNA  
388 sequences<sup>96</sup> using in the web application PhyDesign (<http://phydesign.townsend.yale.edu/>). The  
389 input files were the consensus ML ultrametric tree converted with the function *chronos* of the R-  
390 package APE (<http://ape-package.ird.fr/>) using an smoothing rate of 1 and a relaxed clock model,  
391 and the partitioned concatenated gene alignments.

392

393

### 394 **Acknowledgments**

395

396 We would like to thank Esteban Urrea for helping with the bioinformatics pipelines. We thank  
397 Norris Williams and the late Mark Whitten (University of Florida) for collecting and preparing the  
398 specimens. Kurt Neubig from Southern Illinois University provided the sequences of 11 new  
399 samples. We also thank Janice Valencia for critical feedback on the paper, Juan David Pineda  
400 Cardenas for advising about computational resources used through EAFIT and Juan Carlos Correa  
401 for computational advices at BIOS. The University of Costa Rica provided access to the genetic  
402 material for the projects B8257 and B6140. Finally, we would like to thank IDEA WILD for  
403 supporting with photographic equipment and Sociedad Colombiana de Orquideología for  
404 supporting M. A. Serna-Sánchez with a grant to conduct her undergraduate studies.  
405 O.A.P.E. is supported by the Swiss Orchid Foundation and the Lady Sainsbury Orchid Fellowship.  
406 A.A. acknowledges financial support from the Swedish Research Council (2019-05191), the  
407 Swedish Foundation for Strategic Research (FFL15-0196) and the Royal Botanic Gardens, Kew.

408 **References**

- 409 1. Chase, M. W. *et al.* An updated classification of Orchidaceae: Updated Classification of  
410 Orchidaceae. *Bot. J. Linn. Soc.* **177**, 151–174 (2015).
- 411 2. Givnish, T. J. *et al.* Orchid phylogenomics and multiple drivers of their extraordinary  
412 diversification. *Proc. R. Soc. B Biol. Sci.* **282**, 1553 (2015).
- 413 3. Darwin, Ch., *On the various contrivances by which british and foreign orchids are fertilised*  
414 *by insects, and on the good effects of intercrossing.* London: John Murray. 1st ed., 1st issue.  
415 (1862).
- 416 4. Fay, M. F. & Chase, M. W. Orchid biology: from Linnaeus via Darwin to the 21st century.  
417 *Ann. Bot.* **104**, 359–364 (2009).
- 418 5. Ramírez, S. R. *et al.* Asynchronous diversification in a specialized plant-pollinator  
419 mutualism. *Science* **333**, 1742–1746 (2011).
- 420 6. Borba, E. L., Barbosa, A. R., Melo, M. C. de, Gontijo, S. L. & Oliveira, H. O. de. Mating  
421 systems in the Pleurothallidinae (Orchidaceae): evolutionary and systematic implications.  
422 *Lankesteriana* (2011). doi:10.15517/lank.v11i3.18275
- 423 7. Pérez-Escobar, O. A. *et al.* Multiple geographical origins of environmental sex  
424 determination enhanced the diversification of Darwin’s favourite orchids. *Sci. Rep.* **7**, 12878  
425 (2017).
- 426 8. Pérez-Escobar, O. A., Gottschling, M., Whitten, W. M., Salazar, G. & Gerlach, G. Sex and  
427 the Catasetinae (Darwin’s favourite orchids). *Mol. Phylogenet. Evol.* **97**, 1–10 (2016).
- 428 9. Bateman, R. & Rudall, P. Evolutionary and Morphometric Implications of Morphological  
429 Variation Among Flowers Within an Inflorescence: A Case-Study Using European Orchids.  
430 *Ann. Bot.* **98**, 975–93 (2006).
- 431 10. Dong, W.-L. *et al.* Molecular Evolution of Chloroplast Genomes of Orchid Species: Insights  
432 into Phylogenetic Relationship and Adaptive Evolution. *Int. J. Mol. Sci.* **19**, 716 (2018).
- 433 11. Freudenstein, J. V. & Chase, M. W. Phylogenetic relationships in Epidendroideae  
434 (Orchidaceae), one of the great flowering plant radiations: progressive specialization and  
435 diversification. *Ann. Bot.* **115**, 665–681 (2015).
- 436 12. Luo, J. *et al.* Comparative Chloroplast Genomes of Photosynthetic Orchids: Insights into  
437 Evolution of the Orchidaceae and Development of Molecular Markers for Phylogenetic  
438 Applications. *PLoS One* **9**, e99016 (2014).
- 439 13. Niu, Z. *et al.* The Complete Plastome Sequences of Four Orchid Species: Insights into the



- 440 Evolution of the Orchidaceae and the Utility of Plastomic Mutational Hotspots. *Front. Plant*  
441 *Sci.* **8**, (2017).
- 442 14. Zhang, G.-Q. *et al.* The *Apostasia* genome and the evolution of orchids. *Nature* **549**, 379–  
443 383 (2017).
- 444 15. Zhang, G.-Q. *et al.* The *Dendrobium catenatum* Lindl. genome sequence provides insights  
445 into polysaccharide synthase, floral development and adaptive evolution. *Sci. Rep.* **6**, 19029  
446 (2016).
- 447 16. Yan, L. *et al.* The Genome of *Dendrobium officinale* Illuminates the Biology of the  
448 Important Traditional Chinese Orchid Herb. *Mol. Plant* **8**, 922–934 (2015).
- 449 17. Yuan, Y. *et al.* The *Gastrodia elata* genome provides insights into plant adaptation to  
450 heterotrophy. *Nat. Commun.* **9**, (2018).
- 451 18. Cai, J. *et al.* The genome sequence of the orchid *Phalaenopsis equestris*. *Nat. Genet.* **47**, 65–  
452 72 (2014).
- 453 19. Huang, J.-Z. *et al.* The genome and transcriptome of *Phalaenopsis* yield insights into floral  
454 organ development and flowering regulation. *PeerJ* **4**, e2017 (2016).
- 455 20. Chao, Y.-T. *et al.* Chromosome-level assembly, genetic and physical mapping of  
456 *Phalaenopsis aphrodite* genome provides new insights into species adaptation and resources  
457 for orchid breeding. *Plant Biotechnol. J.* **16**, 2027–2041 (2018).
- 458 21. Hu, Y. *et al.* Genomics-based diversity analysis of *Vanilla* species using a *Vanilla planifolia*  
459 draft genome and Genotyping-By-Sequencing. *Sci. Rep.* **9**, 3416 (2019).
- 460 22. Bogarín, D. *et al.* Anchored Hybrid Enrichment generated nuclear, plastid and mitochondrial  
461 markers resolve the *Lepanthes horrida* (Orchidaceae: Pleurothallidinae) species complex.  
462 *Mol. Phylogenet. Evol.* (2018). doi:10.1016/j.ympev.2018.07.014
- 463 23. Pérez-Escobar, O. A. *et al.* Resolving relationships in an exceedingly young Neotropical  
464 orchid lineage using Genotyping-by-sequencing data. *Mol. Phylogenet. Evol.* **144**, 106672  
465 (2020).
- 466 24. Jin, W.-T. *et al.* Phylogenetics of subtribe Orchidinae s.l. (Orchidaceae; Orchidoideae) based  
467 on seven markers (plastid matK, psaB, rbcL, trnL-F, trnH-psba, and nuclear nrITS, Xdh):  
468 implications for generic delimitation. *BMC Plant Biol.* **17**, (2017).
- 469 25. Li, M.-H., Zhang, G.-Q., Liu, Z.-J. & Lan, S.-R. Subtribal relationships in Cymbidieae  
470 (Epidendroideae, Orchidaceae) reveal a new subtribe, Dipodiinae, based on plastid and  
471 nuclear coding DNA. *Phytotaxa* **246**, 37 (2016).

- 472 26. Nauheimer, L., Schley, R. J., Clements, M. A., Micheneau, C. & Nargar, K. Australasian  
473 orchid biogeography at continental scale: Molecular phylogenetic insights from the Sun  
474 Orchids (*Thelymitra*, Orchidaceae). *Mol. Phylogenet. Evol.* **127**, 304–319 (2018).
- 475 27. Li, Y.-X. *et al.* Phylogenomics of Orchidaceae based on plastid and mitochondrial genomes.  
476 *Mol. Phylogenet. Evol.* **139**, 106540 (2019).
- 477 28. Pérez-Escobar, O. A. *et al.* Recent origin and rapid speciation of Neotropical orchids in the  
478 world's richest plant biodiversity hotspot. *New Phytol.* **215**, 891–905 (2017).
- 479 29. Whitten, W. M., Neubig, K. M. & Williams, N. H. Generic and subtribal relationships in  
480 neotropical Cymbidieae (Orchidaceae) based on matK/ycf1 plastid data. *Lankesteriana* **13**,  
481 375–392 (2014).
- 482 30. Pridgeon, A. *Genera Orchidacearum Vol. 5, Vol. 5.*, (Oxford University Press, 2009).
- 483 31. Pérez-Escobar, O. A. *et al.* The origin and diversification of the hyperdiverse flora in the  
484 Chocó biogeographic region. *Front. Plant Sci.* **10**, 1328 (2019).
- 485 32. Bogarín, D. *et al.* Phylogenetic comparative methods improve the selection of characters for  
486 generic delimitations in a hyperdiverse Neotropical orchid clade. *Sci. Rep.* **9**, 1–17 (2019).
- 487 33. Górniak, M., Paun, O. & Chase, M. W. Phylogenetic relationships within Orchidaceae based  
488 on a low-copy nuclear coding gene, Xdh: Congruence with organellar and nuclear ribosomal  
489 DNA results. *Mol. Phylogenet. Evol.* **56**, 784–795 (2010).
- 490 34. Salazar, G. A., Chase, M. W., Soto Arenas, M. A. & Ingrouille, M. Phylogenetics of  
491 Cranichideae with emphasis on Spiranthinae (Orchidaceae, Orchidoideae): evidence from  
492 plastid and nuclear DNA sequences. *Am. J. Bot.* **90**, 777–795 (2003).
- 493 35. Bone, R. E., Cribb, P. J. & Buerki, S. Phylogenetics of Eulophiinae (Orchidaceae:  
494 Epidendroideae): evolutionary patterns and implications for generic delimitation:  
495 Evolutionary patterns in Eulophiinae. *Bot. J. Linn. Soc.* **179**, 43–56 (2015).
- 496 36. Pérez-Escobar, O. A. *et al.* Andean mountain building did not preclude dispersal of lowland  
497 epiphytic orchids in the Neotropics. *Sci. Rep.* **7**, 4919 (2017).
- 498 37. Salazar, G. A. *et al.* Phylogenetic systematics of subtribe spiranthinae (Orchidaceae:  
499 Orchidoideae: Cranichideae) based on nuclear and plastid DNA sequences of a nearly  
500 complete generic sample. *Bot. J. Linn. Soc.* **186**, 273–303 (2018).
- 501 38. Martins, A. *et al.* From tree tops to the ground: Reversals to terrestrial habit in *Galeandra*  
502 orchids (Epidendroideae: Catasetinae). *Mol. Phylogenet. Evol.* **127**, (2018).
- 503 39. Nunes, C. *et al.* More than euglossines: the diverse pollinators and floral scents of

- 504 Zygopetalinae orchids. *Sci. Nat.* **104**, (2017).
- 505 40. Pansarin, L., Pansarin, E., Gerlach, G. & Sazima, M. The Natural History of *Cirrhaea* and  
506 the Pollination System of Stanhopeinae (Orchidaceae). *Int. J. Plant Sci.* 000–000 (2018).  
507 doi:10.1086/697997
- 508 41. Cisternas, M. A. *et al.* Phylogenetic analysis of Chloraeinae (Orchidaceae) based on plastid  
509 and nuclear DNA sequences. *Botanical Journal of the Linnean Society* (2012).
- 510 42. Ramirez, S. R., Roubik, D. W., Skov, C. & Pierce, N. E. Phylogeny, diversification patterns  
511 and historical biogeography of euglossine orchid bees (Hymenoptera: Apidae). *Biol. J. Linn.*  
512 *Soc.* **100**, 552–572 (2010).
- 513 43. Cingel, N. A. Van Der. *An Atlas of Orchid Pollination: European Orchids*. (CRC Press,  
514 2001).
- 515 44. Weitemier, K. *et al.* Hyb-Seq: Combining target enrichment and genome skimming for plant  
516 phylogenomics. *Appl. Plant Sci.* **2**, 1400042 (2014).
- 517 45. Pridgeon, A. M., Cribb, P. J., Chase, M. W. & Rasmussen, F. N. *Genera Orchidacearum:*  
518 *Vol. 5. Epidendroideae (part two)*. (Oxford University Press, 2009).
- 519 46. Chomicki, G. *et al.* The velamen protects photosynthetic orchid roots against UV-B damage,  
520 and a large dated phylogeny implies multiple gains and losses of this function during the  
521 Cenozoic. *New Phytol.* **205**, 1330–1341 (2015).
- 522 47. Ramírez, S. R., Gravendeel, B., Singer, R. B., Marshall, C. R. & Pierce, N. E. Dating the  
523 origin of the Orchidaceae from a fossil orchid with its pollinator. *Nature* **448**, 1042–1045  
524 (2007).
- 525 48. Freudenstein, J. V. & Chase, M. W. Phylogenetic relationships in Epidendroideae  
526 (Orchidaceae), one of the great flowering plant radiations: progressive specialization and  
527 diversification. *Ann. Bot.* (2015). doi:10.1093/aob/mcu253
- 528 49. Pérez-Escobar, O. A. Molecular phylogenetics, evolution of sexual systems and historical  
529 biogeography of Darwin’s favorite orchids (Catasetinae) and Swan orchids (*Cycnoches*  
530 Lindl.). (Ludwig-Maximilians Universität, 2016).
- 531 50. Soltis, D. E. & Kuzoff, R. K. Discordance between Nuclear and Chloroplast Phylogenies in  
532 the Heuchera Group Author (Saxifragaceae). *Evolution (N. Y.)*. **49**, 727–742 (1995).
- 533 51. van der Niet, T. & Peter Linder, H. Dealing with incongruence in the quest for the species  
534 tree: a case study from the orchid genus *Satyrium*. *Mol. Phylogenet. Evol.* **47**, 154–74  
535 (2008).

- 536 52. Pérez-Escobar, O. A., Balbuena, J. A. & Gottschling, M. Rumbling Orchids: How to Assess  
537 Divergent Evolution between Chloroplast Endosymbionts and the Nuclear Host. *Syst. Biol.*  
538 **65**, (2016).
- 539 53. Fragoso-Martínez, I. *et al.* A pilot study applying the plant Anchored Hybrid Enrichment  
540 method to New World sages (*Salvia* subgenus *Calospatha*; Lamiaceae). *Mol. Phylogenet.*  
541 *Evol.* **117**, 124–134 (2017).
- 542 54. Lévillé-Bourret, É., Starr, J. R., Ford, B. A., Moriarty Lemmon, E. & Lemmon, A. R.  
543 Resolving Rapid Radiations within Angiosperm Families Using Anchored Phylogenomics.  
544 *Syst. Biol.* **67**, 94–112 (2018).
- 545 55. Zhang, R. *et al.* Exploration of Plastid Phylogenomic Conflict Yields New Insights into the  
546 Deep Relationships of Leguminosae. *Syst. Biol.* **69**, 613–622 (2020).
- 547 56. Mark Whitten, W., Williams, N. H., Dressler, R. L., Gerlach, G. & Pupulin, F. Generic  
548 relationships of Zygopetalinae (Orchidaceae: Cymbidieae): Combined molecular evidence.  
549 *Lankesteriana* **5**, 87–107 (2005).
- 550 57. Neubig, K. M., Williams, N. H., Whitten, W. M. & Pupulin, F. Molecular phylogenetics and  
551 the evolution of fruit and leaf morphology of *Dichaea* (Orchidaceae: Zygopetalinae). *Ann.*  
552 *Bot.* **104**, 457–467 (2009).
- 553 58. Pupulin, F. in *Genera Orchidacearum. Vol. 5. Epidendroideae (Part Two)* (eds. Pridgeon,  
554 A. M., Cribb, P. J., Chase, M. W. & Rasmussen, F. N.) **5**, 456–546 (Oxford University  
555 Press, Oxford., 2009).
- 556 59. Bogarín, D. *et al.* Pollination of *Trichosalpinx* (Orchidaceae: Pleurothallidinae) by biting  
557 midges (Diptera: Ceratopogonidae). *Bot. J. Linn. Soc.* (2018).  
558 doi:10.1093/botlinnean/box087
- 559 60. Blanco, M. A. & Barboza, G. Pseudocopulatory pollination in *Lepanthes* (Orchidaceae:  
560 Pleurothallidinae) by fungus gnats. *Ann. Bot.* **95**, 763–772 (2005).
- 561 61. Damon, A. *et al.* A survey of pollination in remnant orchid populations in Soconusco ,  
562 Chiapas , Mexico. **48**, 1–14 (2007).
- 563 62. Policha, T. *et al.* Disentangling visual and olfactory signals in mushroom-mimicking  
564 *Dracula* orchids using realistic three-dimensional printed flowers. *New Phytol.* (2016).  
565 doi:10.1111/nph.13855
- 566 63. Pridgeon, A. M., Solano, R. & Chase, M. W. Phylogenetic relationships in Pleurothallidinae  
567 (Orchidaceae): combined evidence from nuclear and plastid DNA sequences. *Am. J. Bot.* **88**,

- 568 2286–2308 (2001).
- 569 64. Karremans, A. P. *et al.* Phylogenetic reassessment of *Acianthera* (Orchidaceae:  
570 Pleurothallidinae). *Harvard Pap. Bot.* **21**, 171–187 (2016).
- 571 65. Bogarín, D., Karremans, A. P. & Fernández, M. Genus-level taxonomical changes in the  
572 *Lepanthes* affinity (Orchidaceae, pleurothallidinae). *Phytotaxa* **340**, 128–136 (2018).
- 573 67. Karremans, A. P. Genera Pleurothallidarum: an updated phylogenetic overview of  
574 Pleurothallidinae. *Lankesteriana* **16**, 219–241 (2016).
- 575 68. Pridgeon, A. in *Genera Orchidacearum Volume 4: Epidendroideae (Part 1)* 319–422  
576 (2005).
- 577 69. Damián, A., Mitidieri, N. & Chiron, G. A taxonomic synopsis of *Acianthera* (Orchidaceae:  
578 Pleurothallidinae) in Peru, including two new species. *An. del Jard. Bot. Madrid* **75**, 1–21  
579 (2018).
- 580 70. Luer, C. A. A Systematic Method of Classification of the Pleurothallidinae Versus a Strictly  
581 Phylogenetic Method. *Selbyana* **23**, 57–110 (2002).
- 582 71. Stern, W. W. L., Pridgeon, A. & Luer, C. Stem structure and its bearing on the systematics  
583 of Pleurothallidinae (Orchidaceae). *Bot. J. Linn. Soc.* **91**, 457–471 (1985).
- 584 72. Jost, L. & Shepard, A. Two new species of *Teagueia* (Orchidaceae: Pleurothallidinae) from  
585 east-central Ecuador. *Lankesteriana* **11**, 9–14 (2011).
- 586 73. Luer, C. A. Icones Pleurothallidarum VIII. Systematics of *Lepanthopsis*, *Octomeria*  
587 subgenus *Pleurothallopsis*, *Restrepiella*, *Restrepiopsis*, *Salpistele*, and *Teagueia*. Addenda to  
588 *Platystele*, *Porroglossum*, and *Scaphosepalum*. *Monogr. Syst. Bot. from Missouri Bot. Gard.*  
589 **39**, 1–161 (1991).
- 590 74. Luer, C. A. Icones Pleurothallidarum XXIV. A First Century Of New Species of *Stelis* of  
591 Ecuador part one. Addenda to *Lepanthes* of Ecuador. Addenda to *Barbosella*, *Dracula*,  
592 *Dresslerella*, *Lepanthopsis*, *Platystele*, *Pleurothallis*, *Restrepia*, *Scaphosepalum*, *Teagueia*  
593 and . *Monogr. Syst. Bot. from Missouri Bot. Gard.* **88**, 1–122 (2002).
- 594 75. Luer, C. A. Icones Pleurothallidarum VII. Systematics of *Platystele* (Orchidaceae).  
595 *Monogr. Syst. Bot. from Missouri Bot. Gard.* **38**, 1–115 (1990).
- 596 76. Karremans, A. P. *et al.* Phylogenetic reassessment of *Specklinia* and its allied genera in the  
597 pleurothallidinae (Orchidaceae). *Phytotaxa* **272**, 1–36 (2016).
- 598 77. Doyle, J. & Doyle, J. Genomic plant DNA preparation from fresh tissue-CTAB method.  
599 *Phytochem Bull* **19**, 11–15 (1987).

- 600 78. Neubig, K. M. *et al.* in *DNA Banking for the 21st Century: Proceedings of the US Workshop*  
601 *on DNA Banking* (eds. Applequist, W. & Campbell, L.) 81–112 (William L. Brown Center,  
602 Missouri Botanical Garden, 2014).
- 603 79. Bolger, A. M., Lohse, M. & Usadel, B. Trimmomatic: a flexible trimmer for Illumina  
604 sequence data. *Bioinformatics* **30**, 2114–2120 (2014).
- 605 80. Bushnell. BMap/BBTools. (2017).
- 606 81. Bushnell, B., Rood, J. & Singer, E. BBMerge – Accurate paired shotgun read merging via  
607 overlap. *PLoS One* **12**, e0185056 (2017).
- 608 82. Magoc, T. & Salzberg, S. L. FLASH: fast length adjustment of short reads to improve  
609 genome assemblies. *Bioinformatics* **27**, 2957–2963 (2011).
- 610 83. Bankevich, A. *et al.* SPAdes: A New Genome Assembly Algorithm and Its Applications to  
611 Single-Cell Sequencing. *J. Comput. Biol.* **19**, 455–477 (2012).
- 612 84. Chevreux, B., Wetter, T. & Suhai, S. Genome sequence assembly using trace signals and  
613 additional sequence information. in *German conference on bioinformatics* **99**, 45–56  
614 (Citeseer, 1999).
- 615 85. Cock, P. J. A., Grüning, B. A., Paszkiewicz, K. & Pritchard, L. Galaxy tools and workflows  
616 for sequence analysis with applications in molecular plant pathology. *PeerJ* **1**, e167 (2013).
- 617 86. Parakhia, M. V. *et al.* Draft Genome Sequence of the Endophytic Bacterium *Enterobacter*  
618 spp. MR1, Isolated from Drought Tolerant Plant (*Butea monosperma*). *Indian J. Microbiol.*  
619 **54**, 118–119 (2014).
- 620 87. Ward, J. A., Ponnala, L. & Weber, C. A. Strategies for transcriptome analysis in nonmodel  
621 plants. *Am. J. Bot.* **99**, 267–276 (2012).
- 622 88. Li, H. *et al.* The Sequence Alignment/Map format and SAMtools. *Bioinformatics* **25**, 2078–  
623 2079 (2009).
- 624 89. Jin, J. J. *et al.* GetOrganelle: A fast and versatile toolkit for accurate de novo assembly of  
625 organelle genomes. *Genome Biol.* (2020). doi:10.1186/s13059-020-02154-5
- 626 90. Tillich, M. *et al.* GeSeq – versatile and accurate annotation of organelle genomes. *Nucleic*  
627 *Acids Res.* **45**, W6–W11 (2017).
- 628 91. Chan, C. X. & Ragan, M. A. Next-generation phylogenomics. *Biol. Direct* **8**, (2013).
- 629 92. Katoh, K. & Standley, D. M. MAFFT Multiple Sequence Alignment Software Version 7:  
630 Improvements in Performance and Usability. *Mol. Biol. Evol.* **30**, 772–780 (2013).
- 631 93. Stamatakis, A. RAxML version 8: a tool for phylogenetic analysis and post-analysis of large



- 632 phylogenies. *Bioinformatics* **30**, 1312–1313 (2014).
- 633 94. Drummond, A. J. & Rambaut, A. BEAST: Bayesian evolutionary analysis by sampling  
634 trees. *BMC Evol. Biol.* **7**, 214 (2007).
- 635 95. Xiang, X. G. *et al.* Biogeographical diversification of mainland Asian *Dendrobium*  
636 (Orchidaceae) and its implications for the historical dynamics of evergreen broad-leaved  
637 forests. *J. Biogeogr.* **43**, 1310–1323 (2016).
- 638 96. Kosakovskiy, S. L., Frost, S. D. W. & Muse, S. V. HyPhy: Hypothesis testing using  
639 phylogenies. *Bioinformatics* (2005). doi:10.1093/bioinformatics/bti079

640

#### 641 **Author Contributions Statement**

642 M.A.S.S., O.A.P.E., and T.A. designed research; O.A.P.E., M.A.S.S., T.A., C.H. and A.A.  
643 generated new data; M.A.S.S., O.A.P.E., M.F.T., A.C.A.Y., J.A. and S.D. performed all analyses;  
644 O.A.P.E., D.B., M.W.C., M.A.S.S., S.D. and T.A. wrote the manuscript, with contributions from  
645 all authors.

646

#### 647 **Legends**

648 **Table 1.** Absolute ages and confidence intervals of main orchid lineages as inferred under a strict  
649 and relaxed molecular clocks and a Birth-Death model.

650 **Figure 1.** Maximum Likelihood phylogeny of the orchid family inferred from 78 coding plastid  
651 genes. Likelihood bootstrap support values (LBS) < 85% at nodes are highlighted in red together  
652 with their corresponding subtending branches. Orchid genera, tribes and subfamilies are indicated  
653 in the phylogeny together with photographs of selected representative species per subfamily.

654 (Inset): Bar plot showing the frequency of LBS values at nodes as computed by bin intervals of 5  
655 units.

656 **Figure 2.** A comparison of the main plastid topologies of the orchid family published to date. A)  
657 Givnish *et al.*<sup>29</sup> inference based on 75 plastid genes and 39 orchid species; B) Li *et al.*<sup>27</sup> inference  
658 based on 76 plastid genes and 76 orchid species; C) This study: 78 plastid and 264 orchid species.  
659 LBP at nodes are highlighted in red together with their corresponding subtending branches. (Inset):  
660 trees with branch lengths proportional to substitutions/site. Photos: O. Pérez-Escobar.

661

#### 662 **Supplementary materials**



663 **Table S1.** Detailed absolute ages, confidence intervals and rates for the orchid family as inferred  
664 under a strict molecular clock and a birth-death model. The table contains 528 rows and 16  
665 columns and is available at <https://doi.org/10.6084/m9.figshare.13185008.v1>.

666 **Table S2.** Detailed absolute ages, confidence intervals and rates for the orchid family as inferred  
667 under a relaxed molecular clock and a birth-death model. The table contains 528 rows and 16  
668 columns and is available at <https://doi.org/10.6084/m9.figshare.13185008.v1>.

669 **Table S3.** Phylogenetic informativeness per-site.

670 **Table S4.** Phylogenetic net informativeness.

671 **Table S5.** Voucher information and proportion of missing data in gene alignments.

672

673 **Figure S1.** Detailed maximum likelihood tree of the orchid family inferred from 78 plastid genes.  
674 LBP <100 are shown at nodes, with LBP <85 highlighted in red together with their corresponding  
675 subtending branches.

676 **Figure S2.** Chronogram of the orchid family as inferred from a strict molecular clock and a birth-  
677 death model. LBP at nodes <85 are highlighted in red together with their corresponding subtending  
678 branches. Blue bars at nodes denote 95% high density probability (HDP) absolute age intervals.

679 **Figure S3.** Chronogram of the orchid family as inferred from a relaxed molecular clock and a  
680 birth-death model. LBP at nodes <85 are highlighted in red together with their corresponding  
681 subtending branches. Blue bars at nodes denote 95% high density probability (HDP) absolute age  
682 intervals.

683 **Figure S4.** Phylogenetic informativeness (PI) of 78 plastid gene alignments used in this study to  
684 infer orchid relationships. A) Chronogram of Orchidaceae as inferred by PATH8 from the ML tree  
685 derived from RAxML; B) Per-site PI; C) Net PI.

686

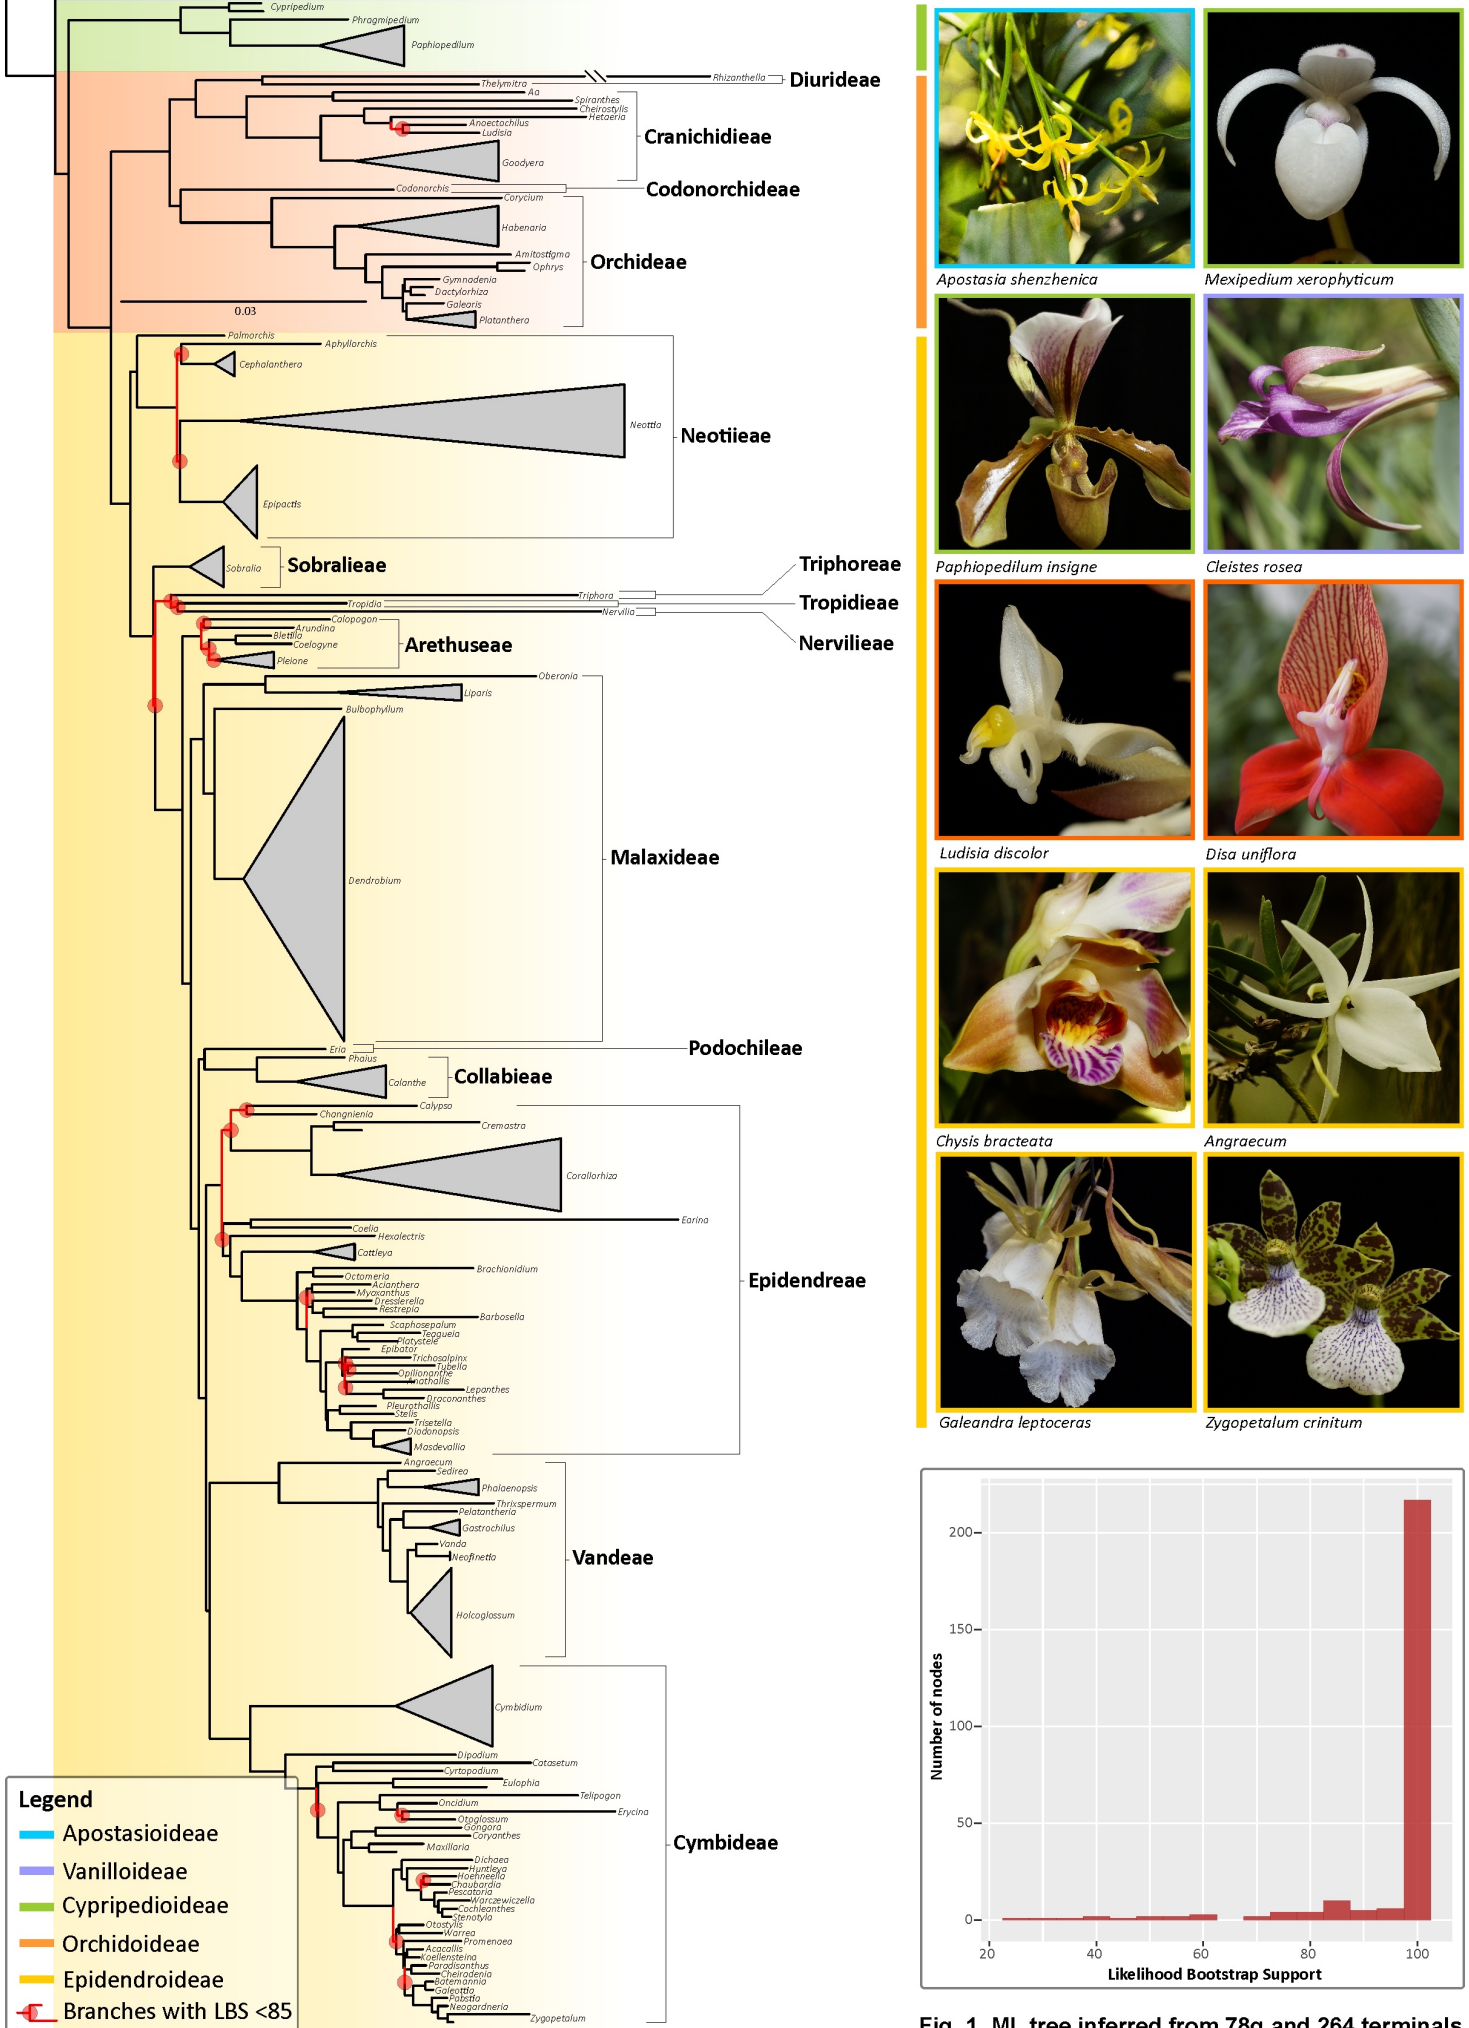

Fig. 1. ML tree inferred from 78g and 264 terminals

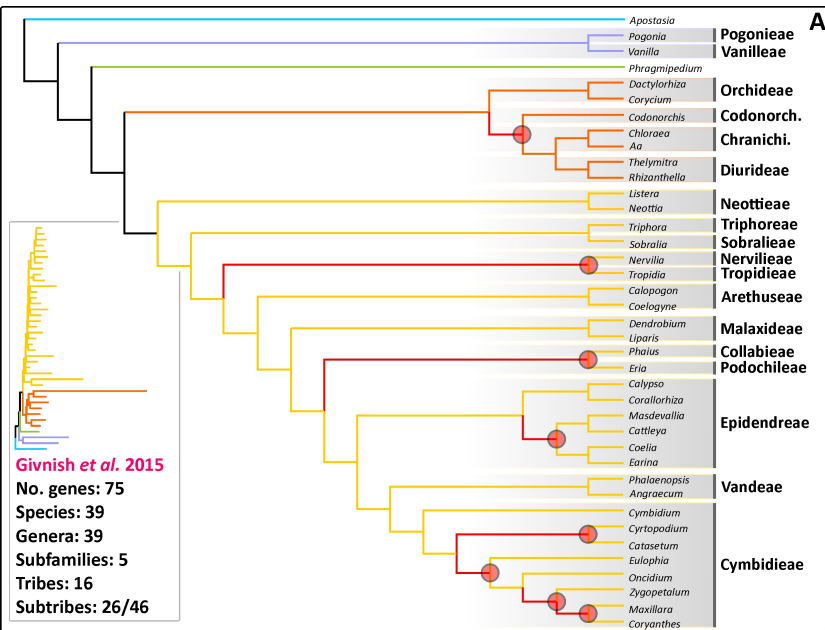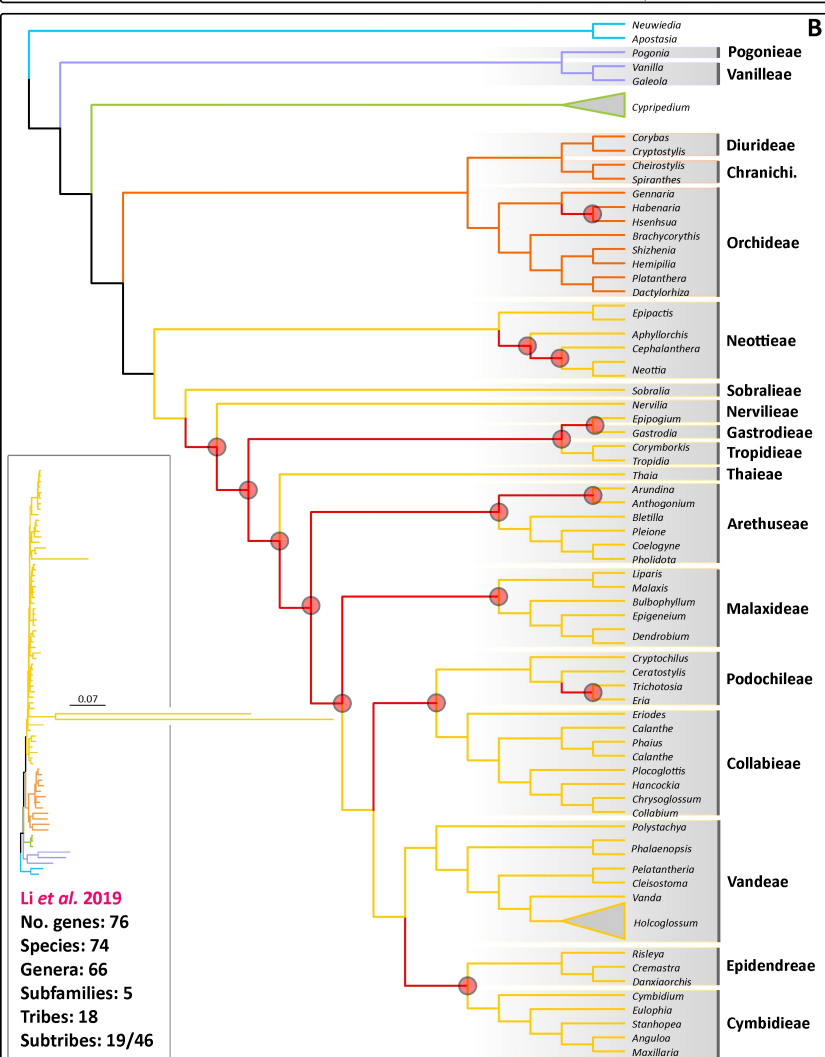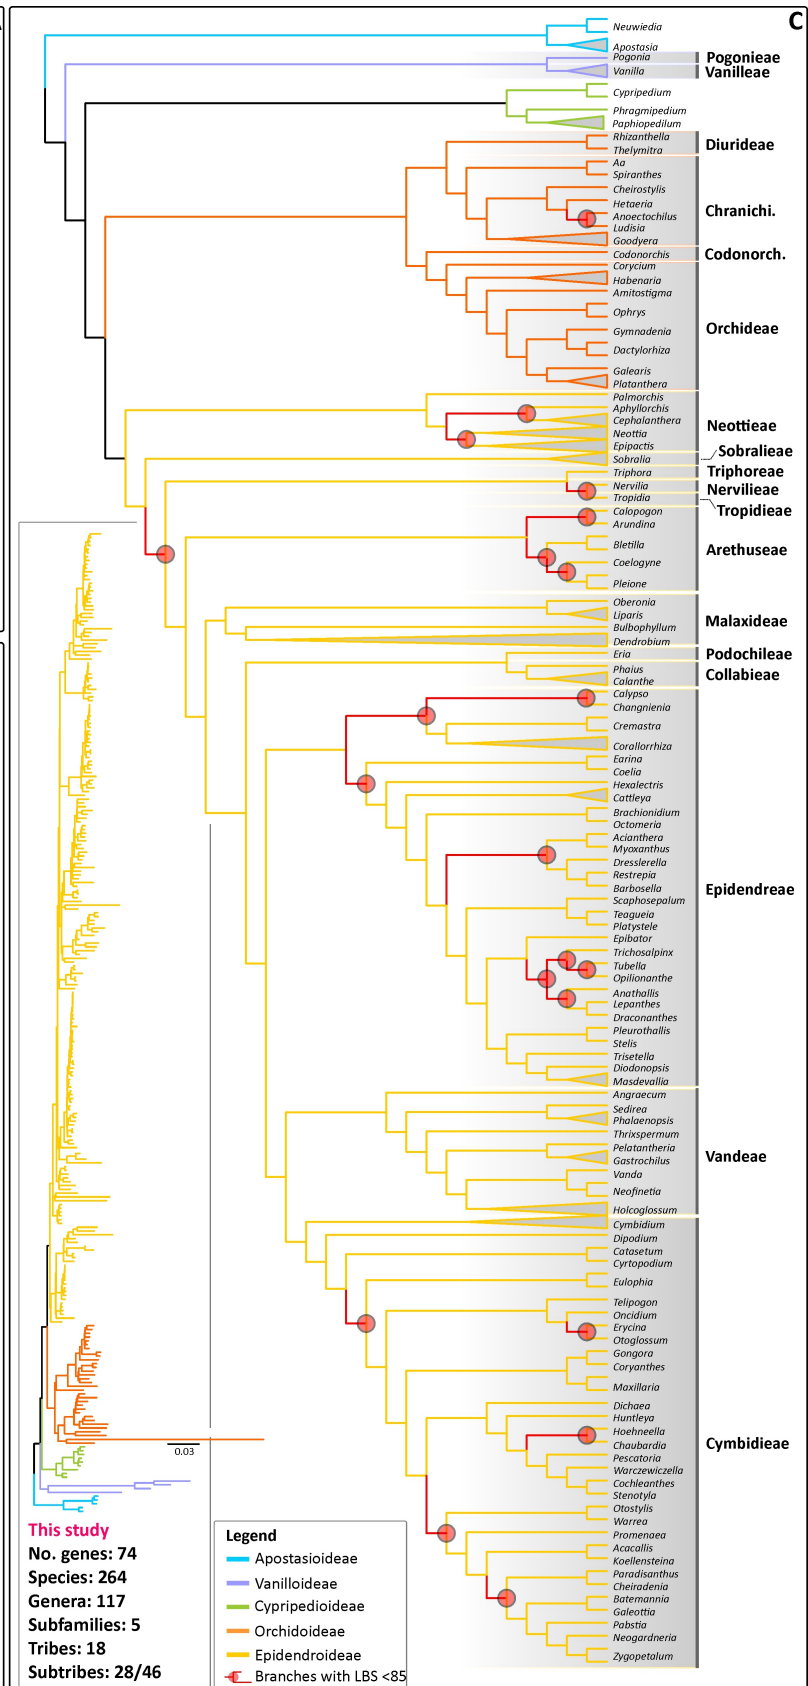

Source: https://www.biorxiv.org/content/10.1101/774018v2.full.pdf
